# Psychiatric Services

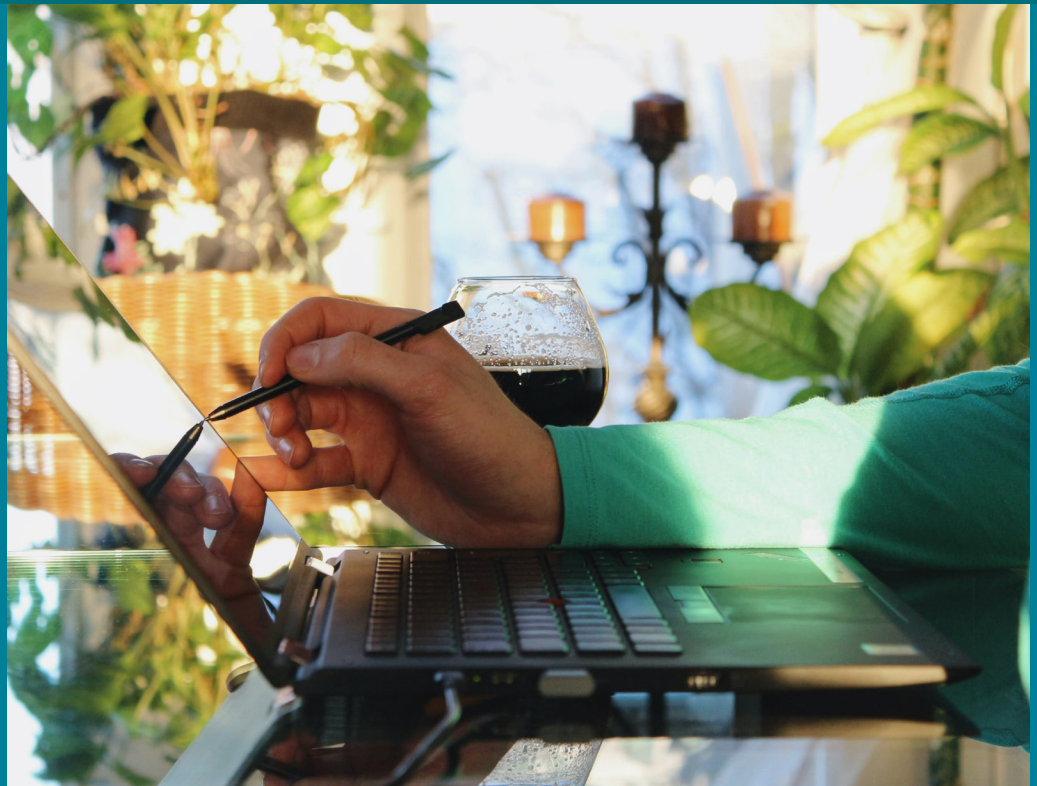

Mid-pandemic national survey on health care workers' quality of life  
Scattergood report: nationwide reform of mental health crisis systems  
Scattergood report: preventing suicide through better gun safety  
Reexamining the 72-hour psychiatric hold
