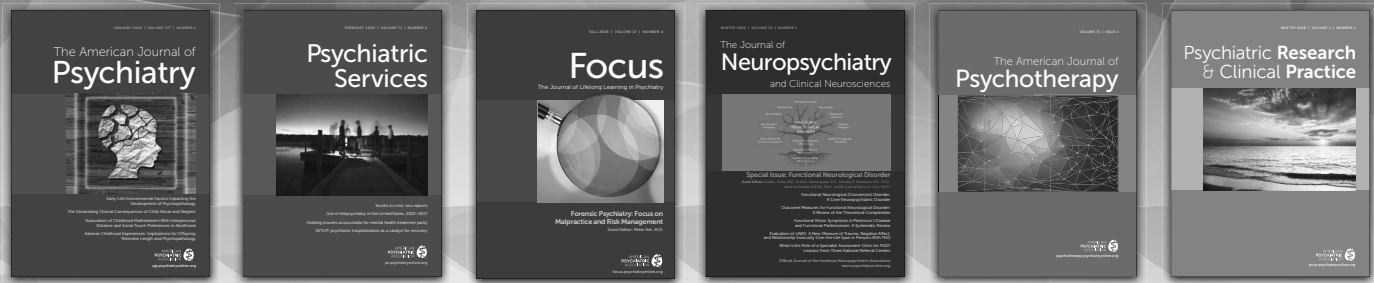

## More Ways to Engage Beyond Reading a Page

The journals of American Psychiatric Association Publishing are leading contributors to the literature. Our articles advance understanding of all aspects of mental and behavioral disorders and their treatment. With close to 10 million page views of journal content annually, APA Publishing's journals reach audiences at more than 2,000 U.S. and international institutions, a figure that includes nearly 100% of U.S. medical schools and hospitals.

APA Publishing is committed to discovery of journal articles and offers several ways to access journal content on the **PsychiatryOnline** knowledge portal, ensuring that practitioners can keep up with the latest findings in the manner they prefer.

### PODCASTS

Each episode brings you an in-depth look at articles featured in that month's issue. Lively discussion and wide-ranging interviews with authors cover the background, rationale, main findings, and future implications of the research.

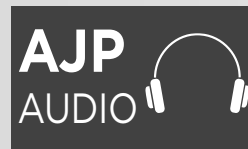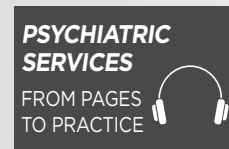

### AUDIO SYNOPSES

Prepared in collaboration with *Psychiatric News*, these audio synopses accompany the online article and can be accessed as a skill through Amazon's Alexa app.

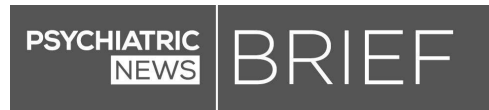

### CURATED COLLECTIONS

These collections of recent and seminal research in a given area can be used as a launch point for authors conducting literature reviews and for educators working on course content. Curated **Editor's Choice** collections from *Psychiatric Services* are currently available.

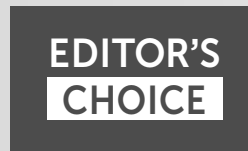

### ALERTS

Keep up with all of the latest research being published by signing up to receive **Publication Alerts** and following on Twitter @APAPubJournals.

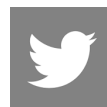

### GET INVOLVED!

We also encourage active contributions to our journals. Submit your research for publication consideration at one of our peer-reviewed titles. Even if you don't have a paper at present, visit our submission site and set up your reviewer account so that you have a say in future contributions to the literature.

[psychiatryonline.org/journals](http://psychiatryonline.org/journals)

Subscribe @ [www.appi.org](http://www.appi.org) • Email: [appi@psych.org](mailto:appi@psych.org) • Toll Free: 1-800-368-5777

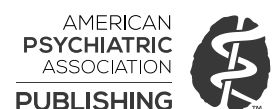

# The DSM-5 Collection

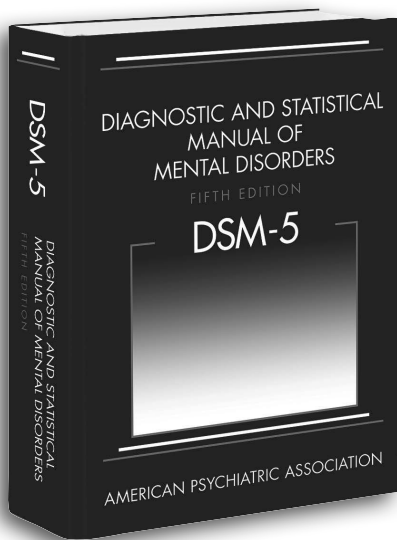

## Diagnostic and Statistical Manual of Mental Disorders, Fifth Edition (DSM-5®)

American Psychiatric Association

This new edition of *Diagnostic and Statistical Manual of Mental Disorders (DSM-5®)*, used by clinicians and researchers to diagnose and classify mental disorders, is the product of more than 10 years of effort by hundreds of international experts in all aspects of mental health. Their dedication and hard work have yielded an authoritative volume that defines and classifies mental disorders in order to improve diagnosis, treatment, and research.

The criteria are concise and explicit, intended to facilitate an objective assessment of symptom presentations in a variety of clinical settings—inpatient, outpatient, partial hospital, consultation-liaison, clinical, private practice, and primary care.

- The latest findings in neuroimaging and genetics have been integrated into each disorder along with gender and cultural considerations.
- The revised organizational structure recognizes symptoms that span multiple diagnostic categories, providing new clinical insights in diagnosis.

- Both ICD-9-CM and ICD-10-CM codes are included for each disorder.

The *Diagnostic and Statistical Manual of Mental Disorders, Fifth Edition*, is the most comprehensive, current, and critical resource for clinical practice available to today's mental health professionals.

2013 • 991 pages • ISBN 978-0-89042-554-1 • Hardcover • \$210.00 • Item #2554

2013 • 991 pages • ISBN 978-0-89042-555-8 • Paperback • \$160.00 • Item #2555

2013 • 991 pages • ISBN 978-0-89042-557-2 • eBook • \$128.00 • Item #2557

**DSM-5**  
COLLECTION

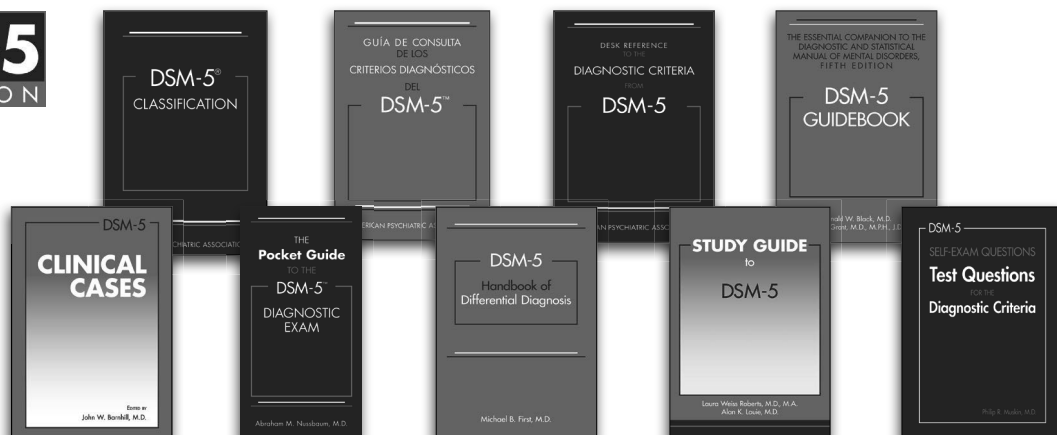

AMERICAN  
PSYCHIATRIC  
ASSOCIATION  
PUBLISHING

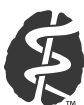

Order Online: [www.appi.org](http://www.appi.org)  
Phone: 703-907-7322  
Toll Free: 1-800-368-5777  
Email: [appi@psych.org](mailto:appi@psych.org)

20% Discount for American Psychiatric Association Members

25% Discount for APA Resident-Fellow Members

AH1842A

## Enable Psychiatric News Brief

With the American Psychiatric Association's new flash briefing, *Psychiatric News Brief*, you can now listen to synopses of curated articles from *Psychiatric News*. Simply enable this skill and you can listen anytime you choose throughout your day by just saying "Alexa, what's my flash briefing" or "Alexa, tell me what's new".

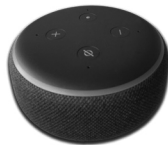

Flash briefing is a customizable Amazon skill that includes updates from your favorite content services. When you say, "Alexa, what's my flash briefing?" or "Alexa, what's the news," you'll hear updates from any organization that you have enabled.

Go to [psychnews.psychiatryonline.org/alexa](https://psychnews.psychiatryonline.org/alexa) to sign up now!

AMERICAN  
PSYCHIATRIC  
ASSOCIATION  
PUBLISHING

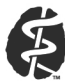

www.appl.org  
Email: [appl@psych.org](mailto:appl@psych.org)  
Phone: 1-800-368-5777

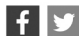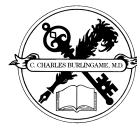

## Call for Nominations

The Institute of Living/Hartford Hospital is pleased to announce that nominations are now being accepted for the 2021 C. Charles Burlingame Award. This award, honoring an outstanding leader in psychiatric education, research or administration, is made in the memory of Dr. Burlingame, psychiatrist-in-chief from 1931 to 1950.

We invite you to nominate a person who has significantly advanced the field of psychiatry. The nomination must include a current curriculum vitae and two letters of support describing the candidate's achievements.

The Institute of Living is a comprehensive behavioral health system for the evaluation and treatment of psychiatric and addiction disorders. We offer a full continuum of services to patients and remain committed to the highest standards of clinical care, research and education.

### Past Recipients

|                                       |                                   |
|---------------------------------------|-----------------------------------|
| 1988 Robert Kellner, M.D., Ph.D.      | 2005 Herbert D. Kleber, M.D.      |
| 1989 William T. Carpenter, Jr., M.D.  | 2006 Daniel N. Stern, M.D.        |
| 1990 Dennis P. Cantwell, M.D.         | 2007 Jerrold F. Rosenbaum, M.D.   |
| 1991 George E. Vaillant, M.D.         | 2008 K. Ranga Rama Krishnan, M.D. |
| 1992 A. John Rush, M.D.               | 2009 David J. Kupfer, M.D.        |
| 1993 John C. Nemiah, M.D.             | 2010 Professor Sir Michael Rutter |
| 1994 Maurice J. Martin, M.D.          | 2011 Jeffrey A. Lieberman, M.D.   |
| 1995 Otto F. Kernberg, M.D.           | 2012 Judith L. Rapoport, M.D.     |
| 1996 Charles P. O'Brien, M.D., Ph.D.  | 2013 Nora D. Volkow, M.D.         |
| 1997 Glen Owen Gabbard, M.D.          | 2014 Daniel R. Weinberger, M.D.   |
| 1998 Lissy F. Jarvik, M.D., Ph.D.     | 2015 David A. Brent, M.D.         |
| 1999 Nancy C. Andreasen, M.D., Ph.D.  | 2016 Steven S. Sharfstein, M.D.   |
| 2000 Lewis L. Judd, M.D.              | 2017 Harold Alan Pincus, M.D.     |
| 2001 Paul S. Appelbaum, M.D.          | 2018 Kenneth S. Kendler, M.D.     |
| 2002 Charles B. Nemeroff, M.D., Ph.D. | 2019 Max Fink, M.D.               |
| 2003 Dilip V. Jeste, M.D.             | 2020 Ned H. Kalin, M.D.           |
| 2004 David H. Barlow, Ph.D.           |                                   |

**Hartford**  
**HealthCare**  
Institute of Living

Nominations should be sent no later than March 19, 2021 to:  
Harold Schwartz, MD  
Psychiatrist-in-Chief Emeritus  
The Institute of Living/Hartford Hospital  
200 Retreat Ave., Hartford, CT 06106  
or e-mail to [Blair.Elliott@hhchealth.org](mailto:Blair.Elliott@hhchealth.org)

# Psychiatric Services

## New Faces and Features for 2021!

Dr. Lisa Dixon and APA welcome the following new Editorial Board members to *Psychiatric Services*:

**Deidre M. Anglin, Ph.D.**  
*City College of New York*

**Chyrell Bellamy, Ph.D., M.S.W.**  
*Yale School of Medicine*

**Sidney H. Hankerson, M.D., M.B.A.**  
*Columbia University*

**Nev Jones, Ph.D., M.S.W.**  
*University of South Florida*

**Michael A. Lindsey, Ph.D., M.S.W., M.P.H.**  
*New York University*

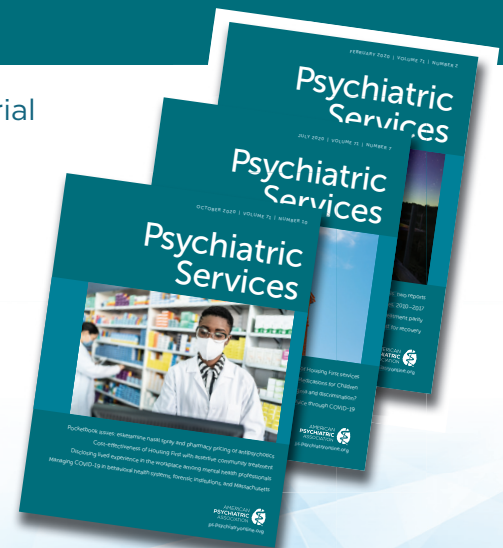

### Three new columns will debut in the next year:

#### Controversies in Psychiatric Services

Edited by Matthew D. Erlich, M.D.,  
Patrick Runnels, M.D., M.B.A., and  
Rachel Talley, M.D.

#### Lived Experience Inclusion & Leadership

Edited by Nev Jones, Ph.D.,  
and Keris Myrick, M.B.A., M.S.

#### Racism and Mental Health Equity

Edited by Michael Mensah, M.D., M.P.H.,  
Lucy Ogbu-Nwobodo, M.D., M.S.,  
and Ruth Shim, M.D., M.P.H.

Visit the journal's website at [ps.psychiatryonline.org](https://ps.psychiatryonline.org) for submission information.

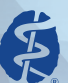

Searching for  
the perfect  
psychiatric  
career?

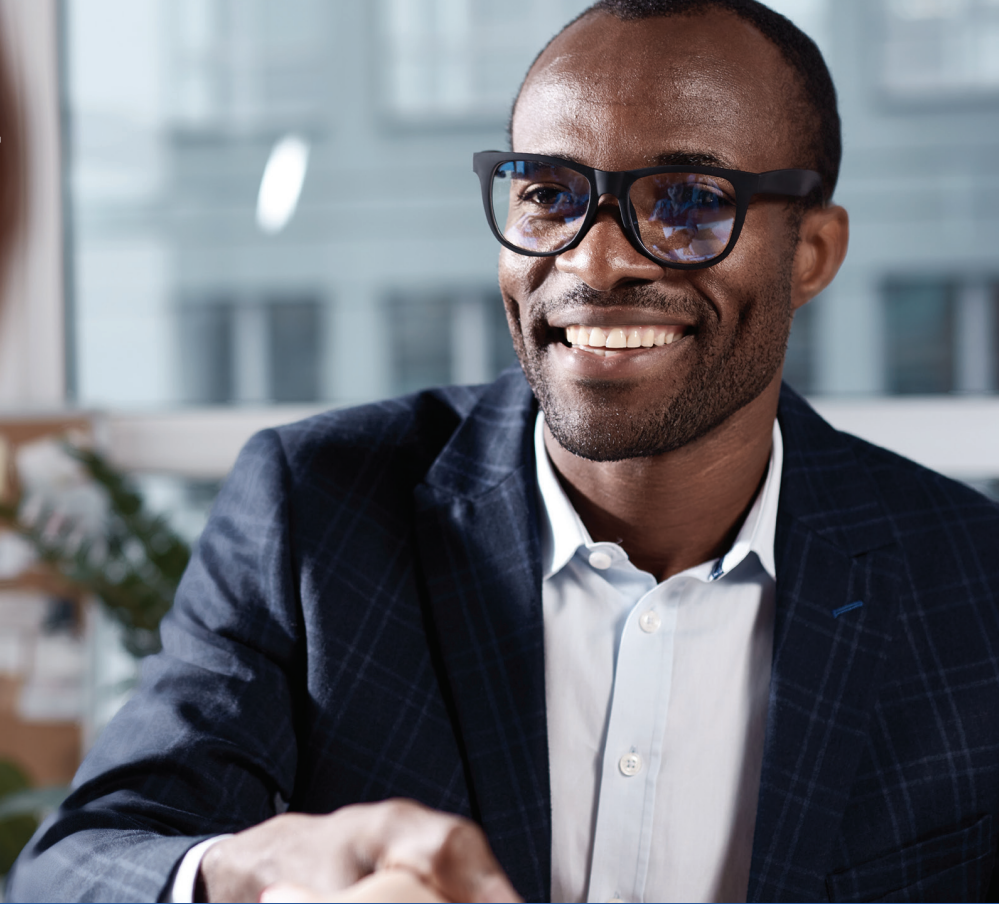

## Let APA JobCentral help!

### Manage Your Career

- Browse hundreds of active job listings!
- Create an account to save jobs, store multiple resumes and cover letters and communicate with employers through our internal messaging system.
- Set up multiple job alerts specifying your skills, interests and location to receive e-mails when employers post jobs that match your criteria.

### Recruit for Open Positions

- Post your job in front of thousands of highly qualified psychiatrists.
- Cross promote your job listing in Psychiatric News.
- Search the anonymous resume database to find your ideal candidate.

AMERICAN  
**PSYCHIATRIC**  
ASSOCIATION

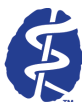

**JOBCENTRAL**  
The Career Hub for Psychiatry

[jobs.psychiatry.org](https://jobs.psychiatry.org)
