# Dive Deeper With *Psychiatric Services*' Topic Collections

Editor Lisa Dixon and the journal's Early Career Psychiatrist Advisory Committee offer **Editor's Choice** curated collections from the rich resource of articles published in *Psychiatric Services*. Updates focus on one area, summarizing for the researcher, clinician, and policy analyst the latest information and seminal research with links to specific content.

**EDITOR'S  
CHOICE**

Available at the journal's website are the following article collections:

- Community-Based Mental Health Crisis Services
- Early Psychosis Intervention
- Family Members and Caregivers
- Health Disparities Among People With Serious Mental Illness
- Homelessness and Mental Health
- Integrated Care
- Mental Health Criminal Justice Diversion
- Mental Health Disparities by Race and Ethnicity of Adults
- Mental Health Services in Rural Areas
- Peer Support
- Perinatal Psychiatry
- Recovery
- Resilience
- Substance Use Disorders
- Suicide Prevention
- Telepsychiatry Service Implementation in the Era of COVID-19
- Violence and Mental Illness

Sign up for Editor's Choice alert at <http://appi.org/etocs>.

Visit [ps.psychiatryonline.org/editorschoice](http://ps.psychiatryonline.org/editorschoice)

AMERICAN  
**PSYCHIATRIC  
ASSOCIATION**  
PUBLISHING

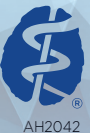

## FREE Online Subscription to *Psychiatric Services* for APA Resident-Fellow Members (RFMs)!

American Psychiatric Association Resident-Fellow Members (RFMs) can receive a free online subscription to *Psychiatric Services*.

Visit [ps.psychiatryonline.org](http://ps.psychiatryonline.org) for full-text access to all of the content in this highly ranked, peer-reviewed monthly journal. *Psychiatric Services* focuses on service delivery in organized systems of care, evolving best practices, and federal and state policies that affect the care of people with mental illnesses.

Please visit [ps.psychiatryonline.org](http://ps.psychiatryonline.org) and log in with your APA username and password.

Psychiatry residents who are not currently APA Resident-Fellow Members should consider membership in the American Psychiatric Association. The benefits provided to residents are an example of how the APA serves the needs of its members throughout their careers. The low introductory dues APA extends to RFMs are even waived for the first year. Please visit [www.psychiatry.org/join-apa](http://www.psychiatry.org/join-apa) for more information.

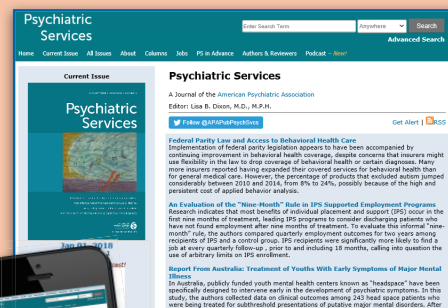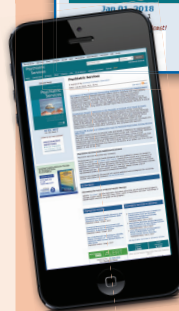

Tune in to our monthly podcast.

**PSYCHIATRIC  
SERVICES**  
FROM PAGES  
TO PRACTICE

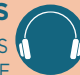

AMERICAN  
**PSYCHIATRIC  
ASSOCIATION**  
PUBLISHING

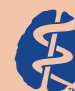

Follow @APAPubPsychSvcs
